# Supplementary material for: Phenotypic and Molecular Characteristics of the MDR Efflux Pump Gene-Carrying Stenotrophomonas maltophilia Strains Isolated in Warsaw, Poland
Source: MDPI journal article supplement (doi:10.3390/biology11010105), 2022-01-10
Supplement: s1 [file s1]

## Supplementary material.

**Table S1.** Presence of efflux pump genes in *S. maltophilia* isolates (n=94).

| No | Isolates | <i>smeD</i><br>( <i>smeD</i> ) <sup>a</sup> | <i>smeB</i><br>( <i>smeA</i> ) <sup>a</sup> | <i>smeK</i><br>( <i>smeI</i> ) <sup>a</sup> | <i>smeZ</i> | <i>smeW</i><br>( <i>smeV</i> ) <sup>a</sup> | <i>smeH</i> | <i>smeP</i> | <i>smeN</i> | <i>smrA</i> | <i>macB</i> |
|----|----------|---------------------------------------------|---------------------------------------------|---------------------------------------------|-------------|---------------------------------------------|-------------|-------------|-------------|-------------|-------------|
| 1  | 1/2010   | +                                           | +                                           | +                                           | +           | +                                           | +           | -           | +           | +           | +           |
| 2  | 2/2010   | +                                           | - (-)                                       | +                                           | +           | +                                           | +           | +           | +           | +           | +           |
| 3  | 3/2010   | +                                           | - (+)                                       | +                                           | +           | +                                           | +           | +           | +           | +           | +           |
| 4  | 4/2010   | +                                           | +                                           | +                                           | +           | +                                           | +           | -           | +           | +           | +           |
| 5  | 5/2010   | +                                           | - (-)                                       | - (+)                                       | +           | +                                           | +           | +           | +           | +           | +           |
| 6  | 6/2010   | +                                           | +                                           | +                                           | +           | +                                           | +           | +           | +           | +           | +           |
| 7  | 7/2010   | +                                           | +                                           | +                                           | +           | +                                           | +           | +           | +           | +           | +           |
| 8  | 8/2010   | +                                           | +                                           | +                                           | +           | +                                           | +           | +           | +           | +           | +           |
| 9  | 9/2010   | +                                           | +                                           | +                                           | +           | +                                           | +           | -           | +           | +           | +           |
| 10 | 10/2010  | +                                           | +                                           | +                                           | +           | +                                           | +           | +           | +           | +           | +           |
| 11 | 11/2010  | +                                           | +                                           | +                                           | +           | +                                           | +           | +           | +           | +           | +           |
| 12 | 12/2010  | +                                           | +                                           | - (+)                                       | +           | +                                           | +           | +           | +           | +           | +           |
| 13 | 13/2010  | +                                           | +                                           | - (-)                                       | +           | +                                           | +           | +           | +           | +           | +           |
| 14 | 14/2010  | +                                           | +                                           | +                                           | +           | +                                           | +           | +           | +           | +           | +           |
| 15 | 15/2010  | +                                           | +                                           | - (+)                                       | +           | +                                           | +           | -           | +           | +           | +           |
| 16 | 16/2010  | +                                           | +                                           | - (+)                                       | +           | +                                           | +           | +           | +           | +           | +           |
| 17 | 17/2010  | +                                           | +                                           | - (+)                                       | +           | +                                           | +           | +           | +           | +           | +           |
| 18 | 18/2010  | +                                           | +                                           | +                                           | +           | +                                           | +           | +           | +           | +           | +           |
| 19 | 19/2010  | +                                           | +                                           | +                                           | +           | +                                           | +           | +           | +           | +           | +           |
| 20 | 20/2011  | - (+)                                       | - (-)                                       | +                                           | +           | +                                           | +           | +           | +           | -           | +           |
| 21 | 21/2011  | +                                           | - (-)                                       | +                                           | +           | +                                           | +           | +           | +           | +           | +           |
| 22 | 22/2011  | +                                           | +                                           | +                                           | +           | +                                           | +           | +           | +           | +           | +           |
| 23 | 23/2011  | +                                           | +                                           | +                                           | +           | +                                           | +           | +           | +           | +           | +           |
| 24 | 24/2011  | +                                           | +                                           | - (+)                                       | +           | +                                           | +           | +           | +           | +           | +           |
| 25 | 25/2011  | +                                           | +                                           | - (+)                                       | +           | +                                           | +           | +           | +           | +           | +           |
| 26 | 26/2011  | +                                           | +                                           | - (+)                                       | +           | +                                           | +           | +           | +           | +           | +           |
| 27 | 27/2011  | +                                           | +                                           | - (+)                                       | +           | +                                           | +           | +           | +           | +           | +           |
| 28 | 28/2011  | +                                           | +                                           | +                                           | +           | +                                           | +           | +           | +           | +           | +           |
| 29 | 29/2011  | +                                           | +                                           | +                                           | +           | +                                           | +           | +           | +           | +           | +           |
| 30 | 30/2011  | +                                           | +                                           | +                                           | +           | +                                           | +           | +           | +           | +           | +           |
| 31 | 31/2011  | +                                           | +                                           | +                                           | +           | +                                           | +           | +           | +           | +           | +           |
| 32 | 32/2011  | - (+)                                       | - (-)                                       | +                                           | +           | +                                           | +           | +           | +           | +           | +           |
| 33 | 33/2011  | +                                           | - (-)                                       | - (-)                                       | +           | +                                           | +           | +           | +           | +           | +           |
| 34 | 34/2011  | +                                           | +                                           | - (+)                                       | +           | +                                           | +           | +           | +           | +           | +           |
| 35 | 35/2011  | +                                           | - (-)                                       | - (-)                                       | +           | +                                           | +           | +           | +           | +           | +           |
| 36 | 36/2011  | +                                           | - (-)                                       | - (-)                                       | +           | +                                           | +           | +           | +           | +           | +           |
| 37 | 37/2011  | +                                           | +                                           | +                                           | +           | +                                           | +           | +           | +           | +           | +           |
| 38 | 38/2011  | +                                           | +                                           | +                                           | +           | +                                           | +           | +           | +           | +           | +           |
| 39 | 39/2011  | - (+)                                       | - (-)                                       | +                                           | +           | +                                           | +           | +           | +           | +           | +           |
| 40 | 41/2011  | +                                           | +                                           | +                                           | +           | +                                           | +           | +           | +           | +           | +           |
| 41 | 42/2011  | +                                           | - (-)                                       | +                                           | -           | +                                           | +           | +           | +           | +           | +           |
| 42 | 43/2011  | +                                           | +                                           | +                                           | +           | +                                           | +           | +           | +           | +           | +           |
| 43 | 44/2011  | +                                           | - (-)                                       | +                                           | +           | +                                           | +           | +           | +           | +           | +           |

[illegible]

|    |         |   |       |       |   |   |   |   |   |   |   |
|----|---------|---|-------|-------|---|---|---|---|---|---|---|
| 93 | 94/2013 | + | - (-) | +     | - | + | + | + | + | + | + |
| 94 | 95/2013 | + | - (-) | - (-) | + | + | + | + | + | + | + |

+, positive result of gene amplification; -, negative result of gene amplification.

<sup>a</sup>For negative results of efflux pump gene amplification, the reaction was repeated with new primers (results in parentheses).
